# Supplementary material
Source: Springer Nature journal article supplement (https://www.springermedizin.de/resource/supplementary/12889_2012_5122_MOESM5_ESM.pdf/9496672)
Supplement: MOESM5 [file 9496672]

Table 4: The main predictors of latrine availability of Latrine among the rural community of Bahir Dar Zuria District, May 2012 (n= 608)

| Variables                                           | Latrine coverage |            | Crude OR<br>(95%CI) | Adjusted OR<br>(95%CI) |
|-----------------------------------------------------|------------------|------------|---------------------|------------------------|
|                                                     | Yes              | No         |                     |                        |
| <b>Income</b>                                       |                  |            |                     |                        |
| <5000birr per year                                  | 109(65.3%)       | 58(34.7%)  | 1                   | 1                      |
| =>5000birr per year                                 | 246(55.8%)       | 195(44.2%) | 1.49(1.03-2.16)     | 1.55(1.06-2.27)*       |
| <b>Frequency of supervision</b>                     |                  |            |                     |                        |
| 1-2 times per month                                 | 211(59.1%)       | 146(40.9%) | 1.38(0.87-2.2)      | 1.51(0.92-2.98)        |
| = >3times per month                                 | 76(51.0)         | 73(49.0%)  | 1.92(1.14-3.24)     | 2.29(1.33-3.93)**      |
| Never visited                                       | 68(66.7%)        | 34(33.3%)  | 1                   | 1                      |
| <b>Walking time from home to health institution</b> |                  |            |                     |                        |
| = >30 minutes                                       | 215(62.5%)       | 129(37.5%) | 1                   | 1                      |
| <30 minutes                                         | 140(53.0%)       | 124(47.0%) | 1.48(1.07-2.04)     | 1.57(1.11-2.22)*       |
| <b>Kebeles accessibility/distance</b>               |                  |            |                     |                        |
| Near –average                                       | 236(55.4%)       | 190(44.6%) | 1                   | 1                      |
| Too far                                             | 119(65.4%)       | 63(34.6%)  | 0.66(0.46-0.94)     | 0.53(0.36-0.77)**      |

- Significant at  $p < 0.005^*$ , Significant at  $p < 0.001^{**}$
